1 **Commercial fishery disturbance of the global open-ocean carbon sink**

2

3 Cavan, E. L.<sup>1†</sup> & Hill, S. L.<sup>2\*\*†</sup>

4

5 <sup>1</sup>Imperial College London, Silwood Park Campus, Ascot, Berkshire, SL5 7PY, UK.

6 <sup>2</sup>British Antarctic Survey, Natural Environment Research Council, High Cross, Madingley  
7 Rd, Cambridge, CB3 0ET, UK.

8

9 †These authors contributed equally

10

11 **\*Corresponding Author:** Simeon Hill, [sih@bas.ac.uk](mailto:sih@bas.ac.uk)

12

13

14

15

16

17

18

19

20

21

22

23

24

25

26

27 **Primary production in the global oceans fuels multiple ecosystem services including**  
28 **fisheries, and the open-ocean biological carbon sink, which support food security and**  
29 **livelihoods<sup>1</sup>, and the regulation of atmospheric CO<sub>2</sub> levels<sup>2</sup> respectively. The spatial**  
30 **distributions of these two services are driven by primary production and it is likely that**  
31 **ecosystem disturbance from fishing impacts both the carbon sink and atmospheric CO<sub>2</sub>.**  
32 **Yet the extent of these impacts from past, present and future fishing is unknown. Here**  
33 **we show that 23% of global export and 40% of fishing effort are concentrated in zones**  
34 **of intensive overlap representing 7% of the global ocean area. This overlap is**  
35 **particularly evident in the Northeast Atlantic and Northwest Pacific. Small pelagic fish**  
36 **dominate catches in these regions and globally, and their exploitation will reduce faecal**  
37 **pellet carbon sinks and may cause tropic cascades affecting plankton communities**  
38 **important in sinking carbon. There is an urgent need to address how fisheries affect**  
39 **carbon cycling, and for policy objectives to include protecting the carbon sink,**  
40 **particularly in areas where fishing intensity and carbon export and storage are high.**

41  
42 The open-ocean carbon sink and store via the biological pump<sup>2,3</sup>, hereafter ‘carbon sink’, is  
43 an important regulator of atmospheric CO<sub>2</sub> levels, which would otherwise be 50 % higher<sup>4</sup>.  
44 Estimates of organic carbon exported out of the top 100 m of the global ocean range from 4 –  
45 12 Gt C yr<sup>-1</sup> <sup>5,6</sup>. Exported carbon sinks down to the deep ocean (> 1000 m) where ~ 1 % is  
46 locked away on timescales from decades to millennia, with the rest being recycled and  
47 eventually converted back to CO<sub>2</sub> by microbes and zooplankton<sup>3</sup>. This 1 % of carbon export  
48 equates to deep ocean carbon sequestration of up to 0.12 Gt C yr<sup>-1</sup>, which is on a par with  
49 coastal blue carbon sequestration (0.11 Gt C yr<sup>-1</sup> from mangroves, salt marshes and  
50 seagrass<sup>7</sup>), or 1.1 % of anthropogenic carbon release (10 Gt C yr<sup>-1</sup>)<sup>8</sup>. The open-ocean carbon  
51 sink is predominantly driven by phyto- and zooplankton at the base of ocean food-webs<sup>3</sup>. The  
52 faecal pellets of current and potential fishery species, including anchovy<sup>9</sup>, krill<sup>10</sup> and  
53 mesopelagic fish<sup>11</sup>, are particularly important in sinking. Any marine ecosystem change  
54 resulting in changes in abundance or community composition of species responsible for  
55 sinking and storing carbon could result in a positive feedback increasing atmospheric CO<sub>2</sub>  
56 levels<sup>12</sup>.

57 Marine fishing currently removes ~ 0.10 Gt yr<sup>-1</sup> of biomass<sup>13</sup> and has profoundly altered  
58 ecosystems throughout the global ocean. These impacts can propagate through foodwebs in  
59 trophic cascades which produce sequential changes in the abundance of successive trophic

60 levels<sup>14</sup>. Fishing also affects the physical habitat, such as through the removal of oyster  
61 beds<sup>15</sup>. These ecological alterations can affect the lower trophic levels responsible for the  
62 majority of carbon fixation and export, and those that contribute to deeper faecal carbon  
63 sinks. The reliance of both fish biomass and the carbon sink on phytoplankton<sup>1,2</sup> creates the  
64 potential for significant spatial overlap between the two and for the fishing to disturb the  
65 carbon sink. Although there is some acknowledgement of potential interactions between the  
66 two<sup>16</sup>, the impact of past and current fishing on the carbon sink and atmospheric CO<sub>2</sub> has not  
67 been investigated, nor is fishery disturbance factored in to forecasts of future changes to the  
68 global carbon cycle<sup>17</sup>.

69

70 The main reason for the lack of attention to this topic is likely a discipline divide between  
71 biogeochemistry and marine ecology. This divide is reflected in models; the biogeochemical  
72 modules of the Earth System Models (ESMs) which inform Intergovernmental Panel on  
73 Climate Change (IPCC) assessment reports do not include trophic levels above  
74 zooplankton<sup>18</sup>. While ecological modellers are working to better link ESMs and models of  
75 fished species<sup>19</sup>, the primary motivation is to investigate the bottom-up impacts of climate  
76 change on these species<sup>20</sup>, rather than top-down controls on the global carbon sink.

77

78 The current study uses global scale satellite data to assess the spatial overlap between  
79 commercial fishing effort<sup>21</sup> and the carbon sink (specifically particulate carbon export at 100  
80 m depth)<sup>6</sup>, thereby mapping the risk of impact. We analyse these data at two scales, namely a  
81 1° x 1° grid and the nineteen major fishing areas (hereafter ‘fishing area’) used by the UN  
82 Food and Agricultural Organisation (FAO) for recording catch statistics. We also identify the  
83 routes by which different fishing practices might impact the carbon sink.

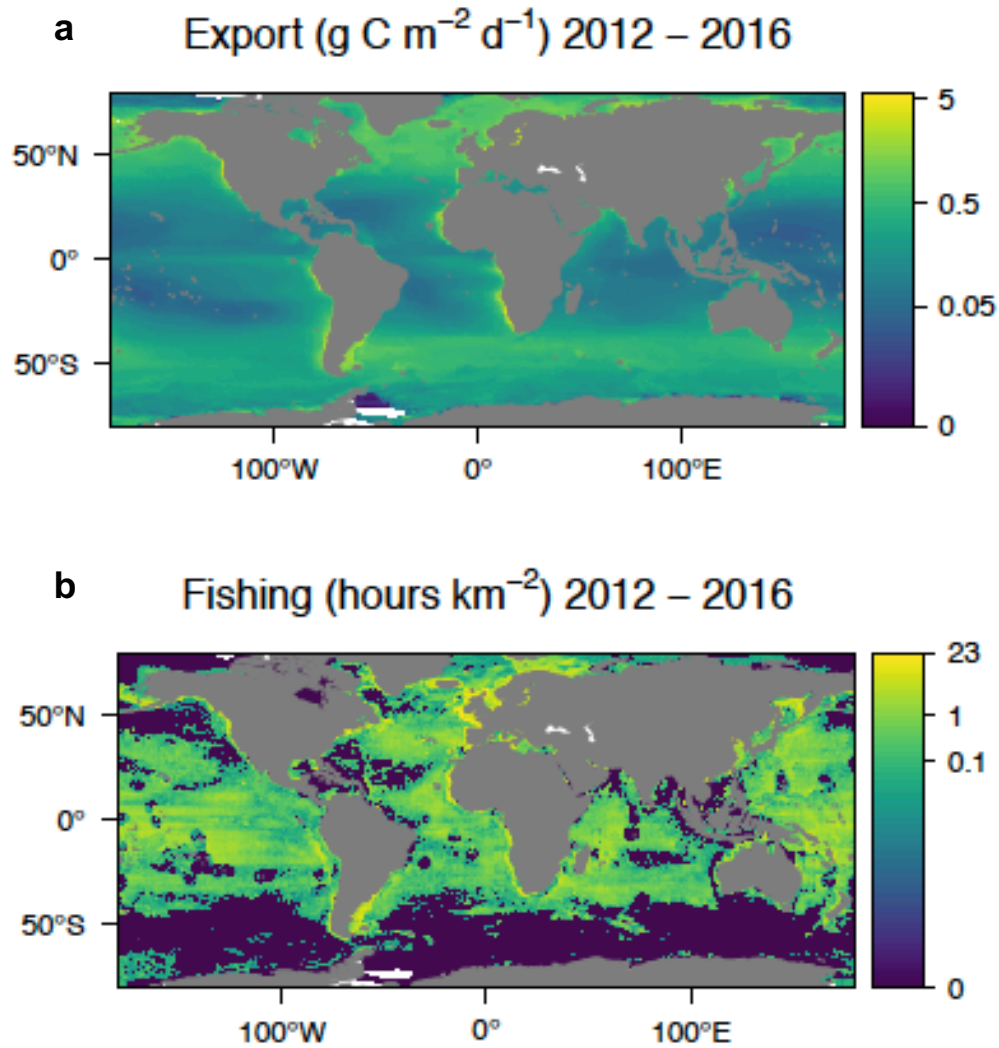

84  
85 **Fig. 1. Global annual carbon sink (export) and fishing intensity.** a) Average annual  
86 particulate organic carbon export (g C m<sup>-2</sup> d<sup>-1</sup>) from 100 m depth estimated using satellite  
87 primary production and sea surface temperature according to the algorithm in Henson et al<sup>6</sup>.  
88 b) Average annual commercial (vessels 6 – 146 m in length) fishing intensity (hours fished  
89 km<sup>-2</sup>), data downloaded from Global Fishing Watch<sup>21</sup>. Both datasets are averaged over a 5-  
90 year period from 2012 – 2016, note the log z-scale.

91  
92 **Regions of high carbon sink and fishing**

93  
94 Both carbon export and fishing intensity are highest around coastlines (Fig. 1), which is  
95 reflected in the map showing areas of combined high carbon export and high fishing intensity  
96 (Fig. 2). Both ecosystem services are concentrated in coastal regions where primary  
97 production is highest<sup>22</sup>. The spatial overlap (orange pixels in Fig. 2) represents 7% of the

98 global oceans by area, but 23% of carbon export and 40 % of fishing effort globally. The two  
99 highest ranking areas, for both carbon export and fishing intensity, are the Northeast Atlantic  
100 (fishing area 27, Fig. 2) and the Northwest Pacific (fishing area 61). These areas are  
101 respectively responsible for 14% and 9% ( $0.46$  and  $0.32$  Gt C yr<sup>-1</sup>) of global carbon export  
102 and 15% and 14% ( $33.26 \times 10^6$  and  $29.99 \times 10^6$  hours yr<sup>-1</sup>) of global fishing effort (Fig. 3,  
103 Supplementary Table 1).  
104

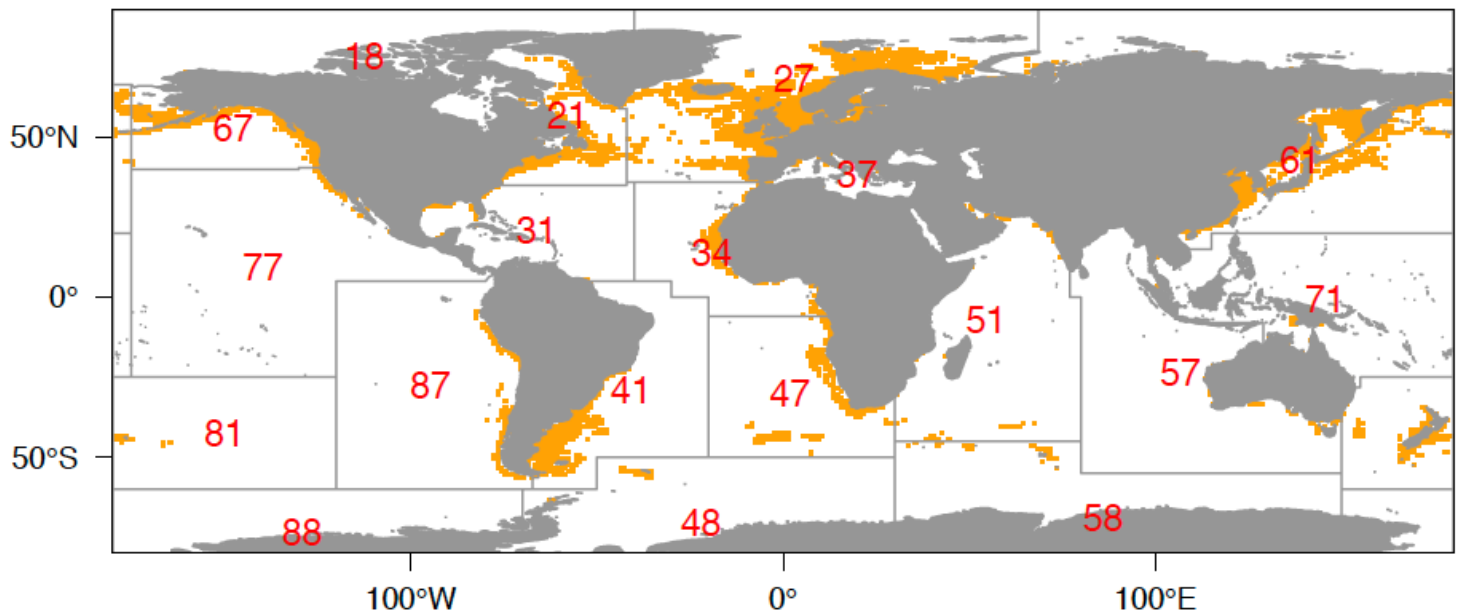

105 **Fig. 2. Regions of high fishing and carbon export intensity.** 1° by 1° grid cells where  
106 carbon export (Fig. 1a) and fishing hours (Fig. 1b) values are in the upper quartile of both  
107 data sets, emphasising the importance of coastal regions at higher latitudes, particularly the  
108 Northeast Atlantic (fishing area 27) and Northwest Pacific (fishing area 61) (see Fig. 3 and  
109 Supplementary Table 1). Grey grid lines and red numbers indicate the FAO major fishing  
110 areas.

111  
112 Fishing intensity increases with total carbon export at the fishing area scale (Fig. 3). The  
113 Arctic fishing area (18) does not follow this pattern as it has high carbon export but relatively  
114 little fishing effort due to seasonal ice cover, although melting sea ice may change this in the  
115 future<sup>23</sup>. Subtropical fishing areas (Central West Pacific, 71, Central East Pacific, 77, and  
116 West Indian, 51) have high total fishing intensity (13 %, 12 % and 9 % of global total  
117 respectively), but fairly low carbon export ( $\leq 5$  %) (Fig. 3). Fishing areas which contain  
118 coastal upwelling regions (e.g. Southeast Pacific, 87, and Southeast Atlantic, 47) make  
119 relatively low contributions to global fishing and export (Fig. 3) because they are dominated

120 by low productivity oligotrophic gyres (Fig. 1a). The high localised primary production, and  
121 thus carbon export and fishing, in coastal upwellings is nonetheless highlighted by our upper  
122 quartile analysis of both data sets (Fig. 2).  
123

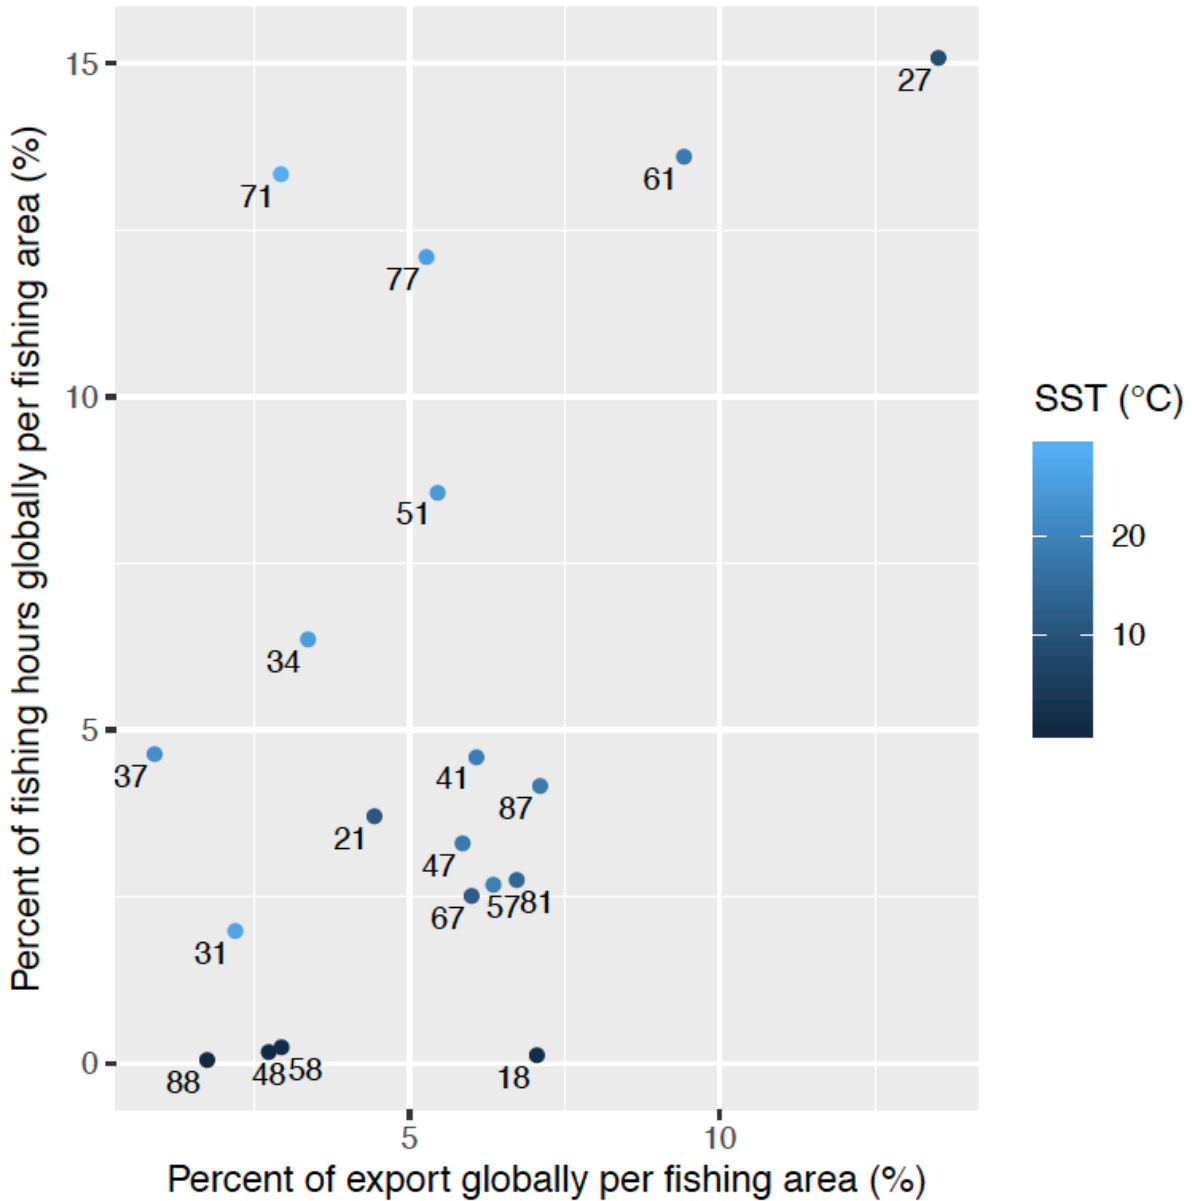

124

125 **Fig. 3. Relationship between carbon export and fishing intensity across fishing areas.**

126 *Percent of global particulate organic carbon export and fishing intensity in each fishing area*  
127 *averaged over 2012 - 2016. Colour of points present the mean sea surface temperature (SST)*  
128 *of each fishing area (Supplementary Table 1) and the labels refer to fishing area number.*

129 *Fishing areas 27 (Northeast Atlantic) and 61 (Northwest Pacific) have highest carbon export*  
130 *and fishing intensity. Fishing area 18 is the Arctic where fishing is minimal, but the export is*  
131 *relatively high due to high primary production and low temperatures.*

## 132 **Impacts of fishing on the carbon sink**

133 From our analysis of FAO catch data, we identified small and medium (< 60 cm length,  
134 hereafter small) pelagic fish as the dominant fished group globally, with trawls the dominant  
135 gear type. In the Northeast Atlantic where fishing intensity and carbon export are highest,  
136 Atlantic mackerel and Atlantic herring dominate the catch, and in the Northwest Pacific  
137 Japanese anchovy is the main fished small pelagic. Fishing small pelagics can have both  
138 direct and indirect impacts on the carbon sink. These fish contribute to the carbon sink  
139 through releasing carbon-rich and fast sinking faecal pellets that can sink at  $> 700 \text{ m d}^{-1}$ <sup>9</sup>  
140 (Fig. 4). For example Peruvian anchoveta may be responsible for around 7 % of local carbon  
141 export<sup>24</sup>. Reducing the biomass of these species will reduce the carbon faecal pellet sink,  
142 which is one of the most important routes to sink organic carbon<sup>25</sup>. Whether the removal of  
143 small pelagics indirectly impacts the lower trophic levels through trophic cascades remains  
144 uncertain. Cod fishing in the Baltic Sea increased small pelagic (sprat) biomass, which led to  
145 a reduction in its zooplankton prey as part of a more extensive trophic cascade<sup>26</sup> (Fig. 4).  
146 However, specific evidence of the existence or extent of indirect impacts caused by trophic  
147 cascades is lacking for major fished species, including for Atlantic herring, mackerel and  
148 Japanese anchovy  
149  
150 Groundfish such as Atlantic cod and Alaska pollock (caught in fishing areas 27 and 61  
151 respectively) are the next most important catch category after small pelagics (Supplementary  
152 Table 1), but their contribution to the carbon sink is also currently unknown. Groundfish  
153 fisheries could have the greatest impacts on the carbon sink through trophic cascades as  
154 described above in the Baltic Sea<sup>26</sup> and physical disturbance of the seabed<sup>27,28</sup> (Fig. 4). The  
155 demersal trawls used in these fisheries create plumes of resuspended material that can remove  
156 seabed carbon at a rate that counteracts sinking carbon<sup>28</sup>. As groundfish reside near the  
157 seabed, the pellets they egest would be subjected to less water column degradation prior to  
158 sedimentation of the carbon. Similarly, mesopelagic fish that live permanently or migrate  
159 daily into this depth realm can increase the sink of carbon to the deep sea and seabed<sup>11</sup>; any  
160 carbon they release below the permanent thermocline (winter mixed layer depth) will not be  
161 subject to water column mixing and remain sequestered for decades or centuries<sup>10</sup>. Thus  
162 targeted or incidental harvesting of mesopelagic species is likely to increase the rate at which  
163 CO<sub>2</sub> returns to the atmosphere (Fig. 4). Other mechanisms by which fishing for any species  
164 could impact the carbon sink include the harvesting or by-catch of fertilising species such as

165 krill<sup>29</sup>, whales<sup>30</sup> or seabirds<sup>31</sup>, and the release of discards causing localized dead zones (see  
166 Supplementary Information) or re-routing carbon through different trophic cycles e.g.  
167 through scavenging seabirds<sup>32</sup> (Fig. 4).

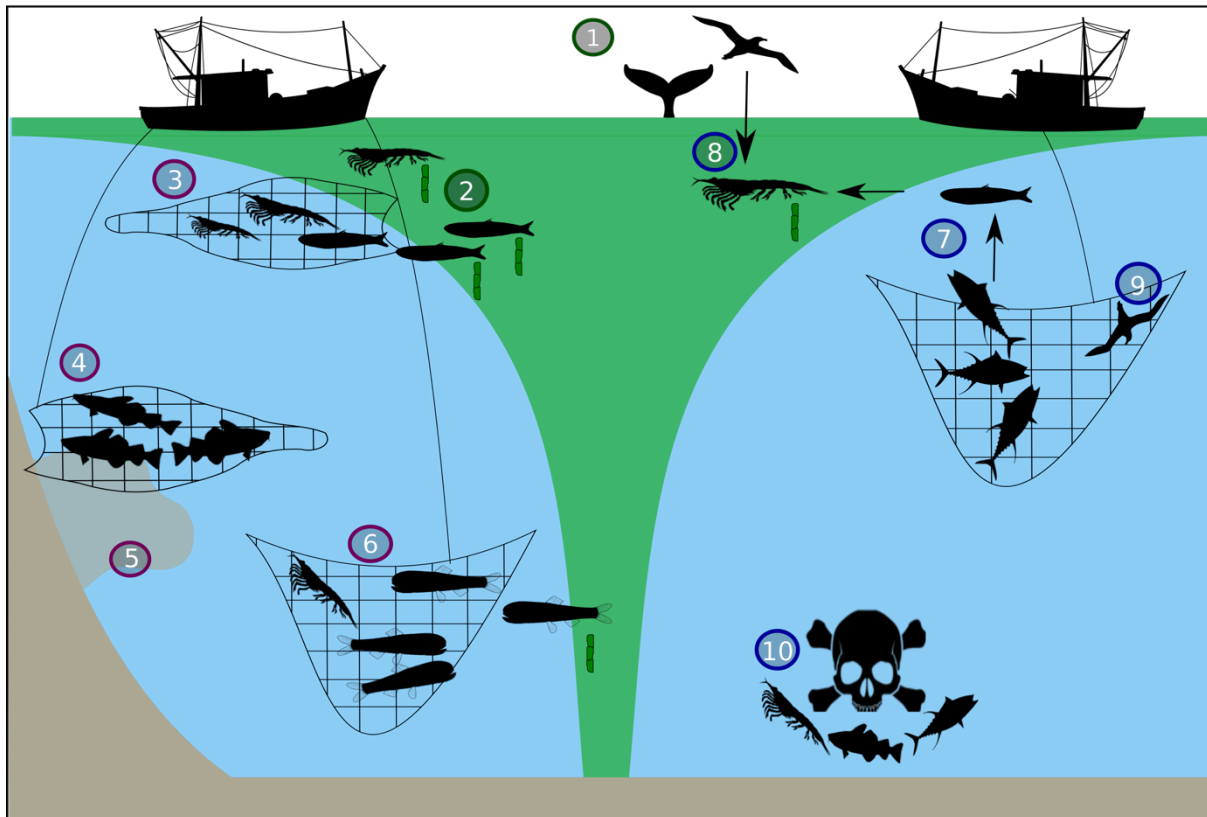

168

169 **Fig. 4. Direct and indirect impacts of fishing to the carbon sink.** Phytoplankton (green  
170 shading in the surface) stimulate fish biomass production and the export of carbon out of the  
171 upper ocean, of which ~ 1 % sinks to the deep ocean. The carbon sink is enhanced by (1)  
172 fertilising species and (2) those egesting fast-sinking carbon-rich faecal pellets. Direct  
173 impacts of fishing include (3) harvesting low-mid trophic level pellet-producing species, (4)  
174 removing species living near the seabed where the sink of carbon will be short, and (5)  
175 harvesting groundfish disturbing the sediment resuspending carbon which could be  
176 remineralised in the water to CO<sub>2</sub>, and finally (6) removing resident or migratory  
177 mesopelagic species that contribute to the carbon sink. Indirect impacts include (7) causing  
178 trophic cascades when removing high trophic level species impacting low trophic level  
179 communities that sink carbon, (8) removing prey items for fertilizing species (e.g. mackerel  
180 or krill that feed seabirds), (9) killing predators (e.g. seabirds) that may otherwise fertilise  
181 the oceans but also help to maintain a balanced food web, and finally (10) the release  
182 discards which could cause localized dead zones.



183

## 184 **Climate change, fishing and the carbon sink**

185 Global carbon export is projected to decline by the end of the century<sup>33</sup>, as a result of changes  
186 to plankton abundance and composition, and reduced primary production<sup>34</sup>. There are no  
187 forecasts of how climate change impacts to higher trophic levels will affect the future carbon  
188 sink. Fishing may further exacerbate the projected climate-driven declines in carbon export,  
189 and thus the store of carbon in the deep ocean, by changing the community composition of  
190 low trophic levels important in carbon export. For instance 30 years of warming in the Baltic  
191 Sea changed the dominant copepod species from the larger *Pseudocalanus acuspes* to the  
192 smaller *Acartia spp*, with overfishing of cod amplifying this regime shift<sup>35</sup>. Climate change  
193 will also likely alter the spatial overlap of fishing and carbon export (Fig. 2). Climate-induced  
194 spatial shifts have already been observed in fish, including poleward shifts as sea  
195 temperatures rise<sup>36</sup>. As for the carbon sink, projections suggest an expansion of oligotrophic  
196 regions where carbon export is currently low (Fig. 1a)<sup>37</sup>, and increases in carbon export  
197 toward the poles. Poleward shifts in both fishing intensity and the carbon sink would result in  
198 smaller, more concentrated areas of overlap than today (Fig. 2), with an increased risk of  
199 impact.

## 200 **Conclusions**

201 There is clear spatial overlap between the carbon sink and commercial fishing. Biomass and  
202 ecosystem changes caused by fishing could negatively impact carbon sinking and storage  
203 throughout the water column and seabed, and therefore atmospheric CO<sub>2</sub> levels. There is an  
204 urgent need to clarify through observations and modelling whether and how fisheries reduce  
205 the carbon sink, and for policy objectives to include protecting this ecosystem service. These  
206 needs are particularly important in the regions where the risk of fishing impacting the carbon  
207 sink is high (Northeast Atlantic and Northwest Pacific). Research is also required into the  
208 potentially synergistic impacts of fishing on the carbon sink, and climate change on both  
209 fishing and the carbon sink. The rebuilding of impacted ecosystems and stocks would help to  
210 reverse impacts on the carbon sink. This rebuilding is already an established fisheries  
211 management and sustainable development objective<sup>27,38</sup> but progress towards this goal is  
212 extremely limited and up to 63% of monitored stocks remain in need of rebuilding<sup>27,39</sup>.  
213 Recognising that the carbon sink is an additional ecosystem service that requires protection

214 strengthens the case for a holistic approach to managing the oceans<sup>27,40</sup> and might help to  
215 achieve a wider suite of environmental goals. We hope improved understanding of how  
216 commercial fisheries disturb the carbon sink will be a step toward realising a sustainable  
217 balance of the twin needs for productive fisheries to maintain global food security and strong  
218 carbon sinks which play a critical role in climate regulation.

219

## 220 **Methods**

221

222 Our indicator of carbon sink intensity (export) is the critical first step in the carbon sink while  
223 our indicator of fishing (effort) is correlated with the main potential route of impact, i.e.  
224 biomass removal (see Supplementary Information). Sea surface temperature was downloaded  
225 from the NASA ocean colour database (<https://oceancolor.gsfc.nasa.gov>) and primary  
226 productivity data from the Ocean Productivity site<sup>41</sup> for the same time frame as availability of  
227 fishing data (2012 – 2016), to calculate particulate organic carbon export ( $\text{g C m}^{-2} \text{d}^{-1}$ ) sink of  
228 carbon out of the top 100 m of the ocean) using the Henson et al.<sup>6</sup> algorithm. Carbon sinks  
229 through the entire ocean depths, but only is stored and sequestered on long timescales if it  
230 reaches the deep sea ( $> 1000 \text{ m}$ ). However, there is not yet a consensus on how to  
231 parameterise the transfer efficiency of carbon to the deep due to the many processes which  
232 control it, whereas there is a consensus that carbon export out of the upper 100 m is  
233 negatively related to temperature<sup>6,42</sup>. Hence, we use carbon export here as our metric from the  
234 global carbon sink. We use data on global fishing intensity (hours fished  $\text{km}^{-2}$ ) taken from all  
235 vessels with an automatic identification system (AIS) and published online by the Global  
236 Fishing Watch<sup>21</sup>. Only data for the years 2012 – 2016 inclusive have been released so we  
237 present the mean annual fishing intensity over this 5-year period. We merged global fishing  
238 intensity and export data onto a  $1 \times 1$  degree resolution grid and identified the areas where  
239 both fishing and export were in the top quartile of their respective datasets globally (orange  
240 pixels in Fig. 2).

241 We assessed the total export, fishing intensity and dominant fishing method (gear type) for  
242 each of the FAO major fishing areas. We obtained gear type data primarily from Tanocet et  
243 al.<sup>43</sup>, which provides total Global Fisheries Landings database<sup>44</sup> effort by gear type for 2010  
244 to 2014. We obtained catch data for the equivalent period from the FAO Global Capture  
245 Production database<sup>13</sup> (Supplementary Table 2). This period overlaps our export and fishing

246 intensity data (Fig. 1a and b) for three years, 2012 – 2014, and fishery catch and effort data  
247 are well correlated (Supplementary Fig. 1). We identified those taxa which dominate the  
248 catch in each fishing area (i.e. the top ranking taxa in terms of catch weight, which constitute  
249 50% or the closest value above 50% of the overall catch) (Supplementary Table 1). We  
250 assigned each taxon to one of the following categories: small pelagic fish (SP); groundfish  
251 (G); large pelagic fish (LP), deep water fish (DF); unspecified fish (UF), pelagic crustaceans  
252 (PC); benthic crustaceans (BC), unspecified crustaceans (UC); squid (S); Unspecified  
253 molluscs (UM); and finally bivalves (B). See Supplementary Table 2 for more detail on this  
254 classification.

255

256 Gear type data were not available for fishing areas in the Southern Ocean (fishing areas 88,  
257 48, 58), nor the Northeast Atlantic (fishing area 27). For the Southern Ocean we were able to  
258 characterise our catch data by gear type, providing data that is comparable to the majority of  
259 other fishing areas. The dominant Southern Ocean fisheries use either longlines to target  
260 toothfish (fishing area 58 & 88) or trawls to target Antarctic krill and mackerel icefish  
261 (fishing area 48, Supplementary Table 1). In the case of the Northeast Atlantic, gear type data  
262 is presented in terms of percentage of fishing hours rather than percentage of catch<sup>43</sup>. Our  
263 Supplementary Table 1 presents these data, which suggest that trawls are the main fishing  
264 gear in the Northeast Atlantic, comprising more than 70% of fishing hours. It is therefore  
265 plausible that trawls are also the main fishing gear by catch, although the two metrics are not  
266 strictly comparable.

267

## 268 **References**

269

270

- 271 1. Pauly, D. & Christensen, V. Primary production required to sustain global fisheries.  
272 *Nature* **374**, 255 (1995).
- 273 2. Volk, T. & Hoffert, M. Ocean Carbon Pumps: Analysis of Relative Strengths and  
274 Efficiencies in Ocean-Driven Atmospheric CO<sub>2</sub> Changes. in *The Carbon Cycle and*  
275 *Atmospheric CO<sub>2</sub>: Natural Variations Archean to Present* 99–110 (American  
276 Geophysical Union, 1985).
- 277 3. Turner, J. T. Zooplankton fecal pellets, marine snow, phytodetritus and the ocean's  
278 biological pump. *Prog. Oceanogr.* **130**, 205–248 (2015).
- 279 4. Parekh, P., Dutkiewicz, S., Follows, M. J. & Ito, T. Atmospheric carbon dioxide in a

- 280 less dusty world. *Geophys. Res. Lett.* **33**, (2006).
- 281 5. Laws, A., Falkowski, G., Smith, O., Hugh, J. & Mccarthy, J. Temperature effects on  
282 export production in the open ocean. *Global Biogeochem. Cycles* **14**, 1231–1246  
283 (2000).
- 284 6. Henson, S. A. *et al.* A reduced estimate of the strength of the ocean’s biological carbon  
285 pump. *Geophys. Res. Lett.* **38**, L04606 (2011).
- 286 7. Duarte, C. M., Middelburg, J. J. & Caraco, N. Major role of marine vegetation on the  
287 oceanic carbon cycle. *Biogeosciences* **2**, 1–8 (2005).
- 288 8. Zeebe, R. E., Ridgwell, A. & Zachos, J. C. Anthropogenic carbon release rate  
289 unprecedented during the past 66 million years. *Nat. Geosci.* **9**, 325–329 (2016).
- 290 9. Saba, G. K. & Steinberg, D. K. Abundance, Composition, and Sinking Rates of Fish  
291 Fecal Pellets in the Santa Barbara Channel. *Sci. Rep.* **2**, 716 (2012).
- 292 10. Cavan, E. L. *et al.* The importance of Antarctic krill in biogeochemical cycles. *Nat.*  
293 *Commun.* **10**, 1–13 (2019).
- 294 11. Davison, P. C., Checkley, D. M., Koslow, J. A. & Barlow, J. Carbon export mediated  
295 by mesopelagic fishes in the northeast Pacific Ocean. *Prog. Oceanogr.* **116**, 14–30  
296 (2013).
- 297 12. DeVries, T. *et al.* Decadal trends in the ocean carbon sink. *Proc. Natl. Acad. Sci.* **116**,  
298 11646 LP – 11651 (2019).
- 299 13. FAO. *FAO yearbook. Fishery and Aquaculture Statistics 2017.* (2019).
- 300 14. Carpenter, S. R., Kitchell, J. F. & Hodgson, J. R. Cascading Trophic Interactions and  
301 Lake Productivity. *Bioscience* **35**, 634–639 (1985).
- 302 15. Grabowski, J. H. & Peterson, C. H. 15 - Restoring Oyster Reefs to Recover Ecosystem  
303 Services. in *Ecosystem Engineers* (eds. Cuddington, K., Byers, J. E., Wilson, W. G. &  
304 Hastings, A. B. T.-T. E. S.) **4**, 281–298 (Academic Press, 2007).
- 305 16. Trebilco, R., Melbourne-thomas, J. & John, A. The policy relevance of Southern  
306 Ocean food web structure : Implications of food web change for fisheries ,  
307 conservation and carbon sequestration. *Mar. Policy* **115**, 103832 (2020).
- 308 17. Laufkötter, C. *et al.* Projected decreases in future marine export production : the role of  
309 the carbon flux through the upper ocean ecosystem. *Biogeosciences Discuss.* **12**, 3731–  
310 3824 (2015).
- 311 18. Yool, A., Popova, E. E. & Anderson, T. R. MEDUSA-2.0: an intermediate complexity  
312 biogeochemical model of the marine carbon cycle for climate change and ocean  
313 acidification studies. *Geosci. Model Dev.* **6**, 1767–1811 (2013).

- 314 19. Tittensor, D. P. *et al.* A protocol for the intercomparison of marine fishery and  
315 ecosystem models: Fish-MIP v1. 0. *Geosci. Model Dev.* **11**, 1421–1442 (2018).
- 316 20. Lotze, H. K., Tittensor, D. P., Bryndum-buchholz, A., Eddy, T. D. & Cheung, W. W.  
317 L. Global ensemble projections reveal trophic amplification of ocean biomass declines  
318 with climate change. **116**, (2019).
- 319 21. Kroodsmá, D. A. *et al.* Tracking the global footprint of fisheries. *Science (80-. )*. **359**,  
320 904–908 (2018).
- 321 22. Behrenfeld, M. J. & Falkowski, P. G. Photosynthetic rates derived from satellite-based  
322 chlorophyll concentration. *Limnol. Oceanogr.* **42**, 1–20 (1997).
- 323 23. Haug, T. *et al.* Future harvest of living resources in the Arctic Ocean north of the  
324 Nordic and Barents Seas: A review of possibilities and constraints. *Fish. Res.* **188**, 38–  
325 57 (2017).
- 326 24. Staresinic, N., Farrington, J., Gagosian, R. B., Clifford, C. H. & Hulburt, E. M.  
327 Downward transport of particulate matter in the Peru coastal upwelling: role of the  
328 anchoveta, *Engraulis ringens*. in *Coastal Upwelling Its Sediment Record* 225–240  
329 (Springer, 1983).
- 330 25. Bisson, K., Siegel, D. A. & DeVries, T. Diagnosing mechanisms of ocean carbon  
331 export in a satellite-based food web model. *Front. Mar. Sci.* (2020).
- 332 26. Casini, M. *et al.* Multi-level trophic cascades in a heavily exploited open marine  
333 ecosystem. *Proc. R. Soc. B Biol. Sci.* 1793–1801 (2008). doi:10.1098/rspb.2007.1752
- 334 27. Duarte, C. M. *et al.* Rebuilding marine life. *Nature* **580**, 39–51 (2020).
- 335 28. Pusceddu, A. *et al.* Chronic and intensive bottom trawling impairs deep-sea  
336 biodiversity and ecosystem functioning. *Proc. Natl. Acad. Sci.* **111**, 8861 LP – 8866  
337 (2014).
- 338 29. Schmidt, K. *et al.* Zooplankton Gut Passage Mobilizes Lithogenic Iron for Ocean  
339 Productivity. *Curr. Biol.* **26**, 2667–2673 (2016).
- 340 30. Ratnarajah, L., Bowie, A. R., Lannuzel, D. & Klaus, M. The Biogeochemical Role of  
341 Baleen Whales and Krill in Southern Ocean Nutrient Cycling. 1–18 (2014).  
342 doi:10.1371/journal.pone.0114067
- 343 31. Shatova, O., Wing, S. R., Gault-Ringold, M., Wing, L. & Hoffmann, L. J. Seabird  
344 guano enhances phytoplankton production in the Southern Ocean. *J. Exp. Mar. Bio.*  
345 *Ecol.* **483**, 74–87 (2016).
- 346 32. Votier, S. C. *et al.* Changes in fisheries discard rates and seabird communities. *Nature*  
347 **427**, 727–730 (2004).

- 348 33. Laufkötter, C. *et al.* Projected decreases in future marine export production: the role of  
349 the carbon flux through the upper ocean ecosystem. *Biogeosciences* **13**, 4023–4047  
350 (2016).
- 351 34. Laufkötter, C. *et al.* Drivers and uncertainties of future global marine primary  
352 production in marine ecosystem models. *Biogeosciences* **12**, 6955–6984 (2015).
- 353 35. Möllmann, C., Müller-Karulis, B., Kornilovs, G. & St John, M. A. Effects of climate  
354 and overfishing on zooplankton dynamics and ecosystem structure: regime shifts,  
355 trophic cascade, and feedback loops in a simple ecosystem. *ICES J. Mar. Sci.* **65**, 302–  
356 310 (2008).
- 357 36. Poloczanska, E. S. *et al.* Responses of Marine Organisms to Climate Change across  
358 Oceans . *Frontiers in Marine Science* **3**, 62 (2016).
- 359 37. Bopp, L. *et al.* Potential impact of climate change on marine export production. *Global*  
360 *Biogeochem. Cycles* **15**, 81–99 (2001).
- 361 38. Worm, B. *et al.* Rebuilding Global Fisheries. *Science (80-. )*. **325**, 578 LP – 585  
362 (2009).
- 363 39. Murawski, S. A. Rebuilding depleted fish stocks: the good, the bad, and, mostly, the  
364 ugly. *ICES J. Mar. Sci.* **67**, 1830–1840 (2010).
- 365 40. Long, R. D., Charles, A. & Stephenson, R. L. Key principles of marine ecosystem-  
366 based management. *Mar. Policy* **57**, 53–60 (2015).
- 367 41. Oregon State University. Science.oregonstate.edu. (2017). Available at:  
368 <http://www.science.oregonstate.edu/ocean.productivity/index.php>. (Accessed: 5th June  
369 2017)
- 370 42. Dunne, J. P., Armstrong, R. a., Gnanadesikan, A. & Sarmiento, J. L. Empirical and  
371 mechanistic models for the particle export ratio. *Global Biogeochem. Cycles* **19**,  
372 GB4026 (2005).
- 373 43. Taconet, M., Kroodsma, D. A. & Fernandes, J. A. *Global Atlas of AIS-based fishing*  
374 *activity - Challenges and opportunities*. (2019).
- 375 44. Watson, R. A. A database of global marine commercial, small-scale, illegal and  
376 unreported fisheries catch 1950–2014. *Sci. data* **4**, 1–9 (2017).

377

### 378 **Acknowledgements**

379 E.L.C was supported by an Imperial College Research Fellowship funded by Imperial  
380 College London. S.H was supported by Natural Environment Research Council core funding  
381 to the British Antarctic Survey Ecosystems programme.

382

383 **Author Contributions**

384 E.L.C conceived the study and analysed the carbon export and fishing intensity data. E.L.C  
385 made the figures. S.H. analysed the catch and gear type data. Both authors contributed  
386 equally to the development of ideas and the writing and editing of this manuscript.

387

388 **Competing interests**

389 The authors claim no competing interests.

390

391 **Additional Information**

392 Supplementary Information is available for this paper. Correspondence and requests for  
393 materials should be addressed to Emma Cavan at [e.cavan@imperial.ac.uk](mailto:e.cavan@imperial.ac.uk) or Simeon Hill at  
394 [sih@bas.ac.uk](mailto:sih@bas.ac.uk).
